# Supplementary material for: Establishment and Application of Indirect ELISAs for Detecting Antibodies against Goose Astrovirus Genotype 1 and 2
Source: MDPI journal article supplement (doi:10.3390/vaccines11030664), 2023-03-15
Supplement: s1 [file s1]

**Table S1.** Determination of the coating virus concentration and serum dilution for the GAstV-1-ELISA.

| Virus concentration |                | Serum dilution |        |       |               |        |
|---------------------|----------------|----------------|--------|-------|---------------|--------|
| (µg/mL)             |                | 1:50           | 1:100  | 1:200 | 1:400         | 1:800  |
| 60                  | P <sup>a</sup> | 1.461          | 1.329  | 1.233 | 1.035         | 0.897  |
|                     | N <sup>a</sup> | 0.324          | 0.207  | 0.179 | 0.209         | 0.126  |
|                     | P/N            | 4.509          | 6.420  | 6.888 | 4.952         | 7.119  |
| 30                  | P              | 1.16           | 1.168  | 1.056 | 1.062         | 0.902  |
|                     | N              | 0.166          | 0.183  | 0.120 | 0.123         | 0.097  |
|                     | P/N            | 6.988          | 6.383  | 8.800 | 8.634         | 9.299  |
| 20                  | P              | 1.019          | 1.227  | 1.144 | 1.037         | 0.874  |
|                     | N              | 0.185          | 0.115  | 0.117 | 0.102         | 0.086  |
|                     | P/N            | 5.508          | 10.670 | 9.778 | 10.167        | 10.163 |
| 15                  | P              | 0.965          | 1.226  | 1.039 | 1.092         | 0.945  |
|                     | N              | 0.156          | 0.152  | 0.136 | 0.106         | 0.089  |
|                     | P/N            | 6.186          | 8.066  | 7.640 | 10.302        | 10.618 |
| 12                  | P              | 1.278          | 1.221  | 1.212 | 1.101         | 0.934  |
|                     | N              | 0.204          | 0.137  | 0.127 | 0.099         | 0.086  |
|                     | P/N            | 6.265          | 8.912  | 9.543 | <b>11.121</b> | 10.860 |
| 10                  | P              | 1.035          | 1.014  | 0.998 | 0.997         | 0.793  |
|                     | N              | 0.229          | 0.126  | 0.106 | 0.101         | 0.076  |
|                     | P/N            | 4.520          | 8.048  | 9.415 | 9.871         | 10.434 |

<sup>a</sup>The OD<sub>450</sub> nm of positive (P) and negative (N) sera

**Table S2.** Determination of the coating protein concentration and sera dilution for the GAstV-2-Cap-ELISA.

| Protein concentration |                | Serum dilution |       |              |       |       |        |
|-----------------------|----------------|----------------|-------|--------------|-------|-------|--------|
| (µg/mL)               |                | 1:50           | 1:100 | 1:200        | 1:400 | 1:800 | 1:1600 |
| 10                    | P <sup>a</sup> | 1.42           | 1.34  | 1.16         | 1.08  | 0.90  | 0.71   |
|                       | N <sup>a</sup> | 0.13           | 0.10  | 0.08         | 0.08  | 0.08  | 0.08   |
|                       | P/N            | 11.32          | 13.84 | 14.13        | 13.71 | 11.12 | 8.55   |
| 5                     | P              | 1.36           | 1.25  | 1.13         | 1.05  | 0.97  | 0.78   |
|                       | N              | 0.12           | 0.09  | 0.08         | 0.08  | 0.08  | 0.08   |
|                       | P/N            | 11.62          | 13.70 | 14.13        | 13.40 | 12.40 | 9.62   |
| 2.5                   | P              | 1.46           | 1.30  | 1.20         | 1.08  | 0.87  | 0.72   |
|                       | N              | 0.12           | 0.09  | 0.08         | 0.08  | 0.07  | 0.08   |
|                       | P/N            | 12.36          | 14.26 | 15.64        | 13.72 | 11.80 | 9.17   |
| 1.25                  | P              | 1.38           | 1.23  | 1.25         | 1.09  | 0.98  | 0.73   |
|                       | N              | 0.11           | 0.09  | 0.08         | 0.08  | 0.08  | 0.08   |
|                       | P/N            | 12.63          | 14.27 | <b>16.45</b> | 14.51 | 12.59 | 9.43   |
| 0.625                 | P              | 1.28           | 1.23  | 1.12         | 1.02  | 0.86  | 0.76   |
|                       | N              | 0.10           | 0.08  | 0.08         | 0.08  | 0.07  | 0.09   |
|                       | P/N            | 12.32          | 15.16 | 14.57        | 13.53 | 11.78 | 8.27   |

<sup>a</sup>The OD<sub>450</sub> nm of positive (P) and negative (N) sera.
